# Supplementary material
Source: MDPI journal article supplement (https://www.mdpi.com/1424-8247/16/1/120)

**Table S1.** List of 20 known active antagonist of FAK1 protein and their binding affinity towards the protein generated through molecular docking method.

| PubChem ID | IC50 (nM) | Chemical Name | Chemical Formula                                                                      | Chemical Structure                                                                    | Binding Afinity |
|------------|-----------|---------------|---------------------------------------------------------------------------------------|---------------------------------------------------------------------------------------|-----------------|
| 58522531   | 6         | BDBM134122    | <a href="#">C<sub>27</sub>H<sub>25</sub>F<sub>4</sub>N<sub>5</sub>O<sub>5</sub></a>   | 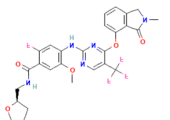   | -9              |
| 58522578   | 1         | BDBM134151    | <a href="#">C<sub>27</sub>H<sub>25</sub>F<sub>4</sub>N<sub>5</sub>O<sub>5</sub></a>   |    | -8.7            |
| 58522559   | 1         | BDBM134145    | <a href="#">C<sub>28</sub>H<sub>30</sub>ClFN<sub>6</sub>O<sub>4</sub></a>             |   | -8.4            |
| 58522525   | 1         | BDBM134129    | <a href="#">C<sub>27</sub>H<sub>27</sub>Cl<sub>2</sub>FN<sub>6</sub>O<sub>4</sub></a> |  | -8.0            |

|          |   |            |                                                                                       |                                                                                       |      |
|----------|---|------------|---------------------------------------------------------------------------------------|---------------------------------------------------------------------------------------|------|
| 58522543 | 6 | BDBM134017 | <a href="#">C<sub>28</sub>H<sub>27</sub>ClF<sub>3</sub>N<sub>5</sub>O<sub>4</sub></a> | 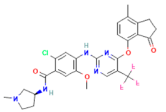   | -8.0 |
| 58522647 | 1 | BDBM134167 | <a href="#">C<sub>29</sub>H<sub>33</sub>ClN<sub>6</sub>O<sub>5</sub></a>              |    | -7.9 |
| 58522593 | 4 | BDBM134002 | <a href="#">C<sub>27</sub>H<sub>25</sub>F<sub>4</sub>N<sub>5</sub>O<sub>5</sub></a>   |    | -7.7 |
| 58522523 | 4 | BDBM134035 | <a href="#">C<sub>30</sub>H<sub>31</sub>F<sub>5</sub>N<sub>6</sub>O<sub>4</sub></a>   |   | -7.6 |
| 58522553 | 1 | BDBM134115 | <a href="#">C<sub>28</sub>H<sub>29</sub>F<sub>3</sub>N<sub>6</sub>O<sub>5</sub></a>   |  | -7.5 |

|          |      |              |                                                                                                  |                                                                                       |      |
|----------|------|--------------|--------------------------------------------------------------------------------------------------|---------------------------------------------------------------------------------------|------|
| 58522562 | 1    | BDBM134134   | <a href="#">C<sub>29</sub>H<sub>31</sub>F<sub>3</sub>N<sub>6</sub>O<sub>4</sub></a>              | 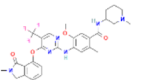   | -7.5 |
| 58522601 | 2    | BDBM134195   | <a href="#">C<sub>23</sub>H<sub>24</sub>ClN<sub>5</sub>O<sub>3</sub></a>                         |    | -7.4 |
| 58522569 | 3    | BDBM134192   | <a href="#">C<sub>23</sub>H<sub>20</sub>F<sub>3</sub>N<sub>5</sub>O<sub>4</sub></a>              |    | -7.2 |
| 11525210 | 4    | BDBM50184049 | C <sub>23</sub> H <sub>23</sub> N <sub>5</sub> O <sub>5</sub>                                    |    | -7.1 |
| 58522632 | 8    | BDBM134053   | <a href="#">C<sub>31</sub>H<sub>34</sub>F<sub>3</sub>N<sub>5</sub>O<sub>3</sub></a>              |  | -7.1 |
| 44563062 | 0.94 | BDBM50246286 | <a href="#">C<sub>21</sub>H<sub>22</sub>F<sub>3</sub>N<sub>5</sub>O<sub>4</sub>S<sub>2</sub></a> |  | -7.0 |

|          |   |            |                                                                                     |                                                                                     |      |
|----------|---|------------|-------------------------------------------------------------------------------------|-------------------------------------------------------------------------------------|------|
| 46208089 | 2 | BDBM134081 | <a href="#">C<sub>25</sub>H<sub>26</sub>ClN<sub>5</sub>O<sub>3</sub></a>            | 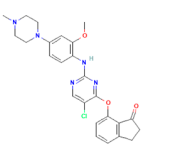 | -7.8 |
| 46208482 | 1 | BDBM134146 | <a href="#">C<sub>28</sub>H<sub>30</sub>ClFN<sub>6</sub>O<sub>4</sub></a>           |  | -6.8 |
| 46208388 | 8 | BDBM126852 | <a href="#">C<sub>27</sub>H<sub>28</sub>F<sub>3</sub>N<sub>5</sub>O<sub>5</sub></a> |  | -6.6 |
| 58522590 | 2 | BDBM134181 | <a href="#">C<sub>25</sub>H<sub>24</sub>F<sub>3</sub>N<sub>5</sub>O<sub>4</sub></a> |  | -6.5 |

Table S2: Generated ten ligand based model and score

| Name    | Score  |
|---------|--------|
| Model 1 | 0.9180 |
| Model 2 | 0.9170 |
| Model 3 | 0.9157 |
| Model 4 | 0.9108 |

|          |        |
|----------|--------|
| Model 5  | 0.9095 |
| Model 6  | 0.9075 |
| Model 7  | 0.9038 |
| Model 8  | 0.8612 |
| Model 9  | 0.8606 |
| Model 10 | 0.8596 |

Table S3: List of MM/GBSA component and their energy with standard error value of the selected three compounds and Control.

| Compound        | MMGBSA-dG-binding energy | MMGBSA-dG-bind in Coulomb | MMGBSA-dG-bind(NS) | MMGBSA-dG bind(NS)-Coulomb |
|-----------------|--------------------------|---------------------------|--------------------|----------------------------|
| CID2460120<br>3 | -45.8499±6.03            | -15.9768±6.03             | -50.0216±6.42      | -20.1245±6.42              |
| CID1893370      | -58.1706±11.35           | -18.4305±11.35            | -62.5148±11.45     | -20.5074±11.45             |
| CID1635554<br>1 | -57.0858±9.89            | -10.2166±9.89             | -65.5522±10.99     | -13.9453±10.99             |
| Apo protein     | -92.4586±4.86            | -68.181±4.89              | -96.0087±5.09      | -70.1273±5.09              |

Figure S1 : Ten ligand based model overview

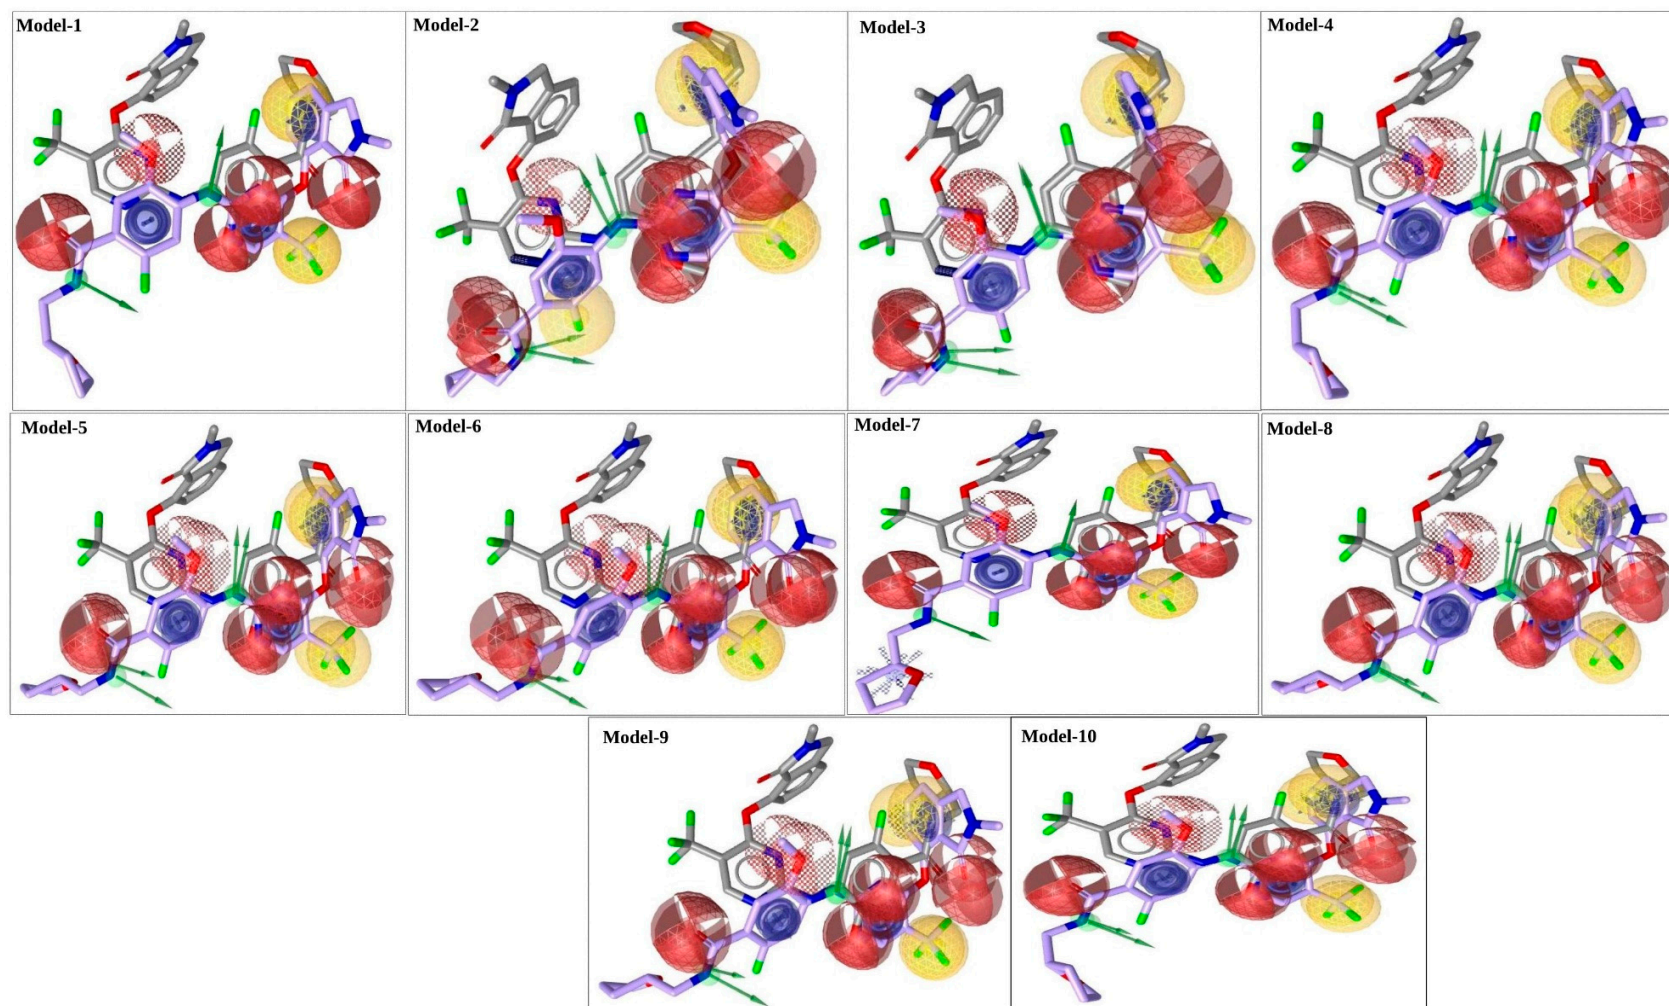

Supplement: s1 [file s1]
